# Supplementary material for: HomolWat: a web server tool to incorporate ‘homologous’ water molecules into GPCR structures
Source: PubMed Central journal article supplement (PMC7319549; doi:10.1093/nar/gkaa440), 2020-06-02
Supplement: gkaa440_supplemental_file.pdf [file gkaa440_supplemental_file.pdf]

| Receptor      | Crystal |                          | HomoWat                  |                           |             | Dowser+                  |                           |             |
|---------------|---------|--------------------------|--------------------------|---------------------------|-------------|--------------------------|---------------------------|-------------|
|               | PDB id  | Internal water molecules | Internal water molecules | Recovered water molecules | (%)         | Internal water molecules | Recovered water molecules | (%)         |
| OPSD          | 1U19    | 14                       | 72                       | 13                        | 92.9        | 88                       | 12                        | 85.7        |
| CXCR4         | 3ODU    | 17                       | 92                       | 7                         | 41.2        | 72                       | 4                         | 23.5        |
| PAR1          | 3VW7    | 23                       | 72                       | 12                        | 52.2        | 66                       | 17                        | 73.9        |
| ADRB1         | 4BVN    | 19                       | 102                      | 17                        | 89.5        | 79                       | 15                        | 78.9        |
| OPRM          | 4DKL    | 9                        | 88                       | 8                         | 88.9        | 66                       | 7                         | 77.8        |
| OPRD          | 4N6H    | 27                       | 86                       | 23                        | 85.2        | 66                       | 19                        | 70.4        |
| P2Y12         | 4PXZ    | 10                       | 65                       | 5                         | 50          | 84                       | 8                         | 80.0        |
| AA2AR         | 5IU4    | 60                       | 107                      | 59                        | 98.3        | 64                       | 42                        | 70.0        |
| FFAR1         | 5TZR    | 9                        | 71                       | 9                         | 100         | 48                       | 8                         | 88.9        |
| CCR5          | 5UIW    | 24                       | 82                       | 13                        | 54.2        | 80                       | 19                        | 79.2        |
| DRD4          | 5WIU    | 9                        | 87                       | 7                         | 77.8        | 71                       | 5                         | 55.6        |
| OX2R          | 5WQC    | 32                       | 103                      | 30                        | 93.8        | 85                       | 22                        | 68.8        |
| ACM2          | 5YC8    | 15                       | 98                       | 14                        | 93.3        | 72                       | 15                        | 100.        |
| C5AR1         | 6C1R    | 31                       | 89                       | 21                        | 67.7        | 73                       | 21                        | 67.7        |
| CCR2          | 6GPX    | 9                        | 78                       | 7                         | 77.8        | 41                       | 7                         | 77.8        |
| EDNRB         | 6IGK    | 29                       | 82                       | 19                        | 65.5        | 101                      | 26                        | 89.7        |
| SUCR1         | 6RNK    | 34                       | 62                       | 24                        | 70.6        | 56                       | 24                        | 70.6        |
| CLTR1         | 6RZ4    | 13                       | 77                       | 11                        | 84.6        | 86                       | 9                         | 69.2        |
| OX1R          | 6TOD    | 14                       | 102                      | 14                        | 100         | 73                       | 7                         | 50.0        |
| <b>Median</b> |         |                          | <b>86</b>                |                           | <b>84.6</b> | <b>72</b>                |                           | <b>73.9</b> |

**Supplementary Table 1. Recovery of water molecules using HomoWat and Dowser+ in the test set.** The table lists the number of determined internal water molecules for each PDB entry, followed by the number of incorporated waters and the number and percentage of recovered waters within a radius of up to 2.0 Å relative to the resolved water.

| Crystal        |      | Homolwat         |                    | Dowser+          |                    |
|----------------|------|------------------|--------------------|------------------|--------------------|
| Receptor       | PDB  | Average distance | Standard deviation | Average distance | Standard deviation |
| OPSD           | 1U19 | 0.43             | 0.26               | 0.64             | 0.27               |
| CXCR4          | 3ODU | 0.84             | 0.41               | 1.5              | 0.16               |
| PAR1           | 3VW7 | 1.24             | 0.51               | 0.68             | 0.35               |
| ADRB1          | 4BVN | 0.46             | 0.34               | 0.89             | 0.44               |
| OPRM           | 4DKL | 1.04             | 0.59               | 1.16             | 0.36               |
| OPRD           | 4N6H | 0.93             | 0.55               | 0.78             | 0.46               |
| P2Y12          | 4PXZ | 1.33             | 0.42               | 0.57             | 0.4                |
| AA2AR          | 5IU4 | 0.3              | 0.32               | 0.83             | 0.54               |
| FFAR1          | 5TZR | 0.27             | 0.07               | 0.5              | 0.42               |
| CCR5           | 5UIW | 0.83             | 0.56               | 0.78             | 0.47               |
| DRD4           | 5WIU | 0.34             | 0.2                | 0.75             | 0.49               |
| OX2R           | 5WQC | 0.58             | 0.43               | 0.73             | 0.52               |
| ACM2           | 5YC8 | 0.37             | 0.31               | 0.84             | 0.54               |
| C5AR1          | 6C1R | 1.05             | 0.63               | 0.71             | 0.63               |
| CCR2           | 6GPX | 0.68             | 0.31               | 0.77             | 0.55               |
| EDNRB          | 6IGK | 1.11             | 0.53               | 0.66             | 0.49               |
| SUCR1          | 6RNK | 0.62             | 0.53               | 0.73             | 0.58               |
| CLTR1          | 6RZ4 | 1.33             | 0.45               | 1.22             | 0.4                |
| OX1R           | 6TOD | 0.28             | 0.17               | 0.45             | 0.31               |
| <b>Average</b> |      | <b>0.68</b>      | <b>0.42</b>        | <b>0.75</b>      | <b>0.46</b>        |

**Supplementary Table 2. Distance between the positions of incorporated and original water molecules using HomoWat and Dowser+ on the test set.** The table lists the average distances for all molecules in the PDB entry and the standard deviation.

**Supplementary Figure 1. Distribution of structurally resolved internal water molecules within GPCR families and subfamilies.** The cumulative number of water molecules per receptor (shown in parenthesis) is represented by circle size. Circular tree adapted from a radial cluster dendrogram of a D<sup>3</sup> Data-Driven notebook (1).

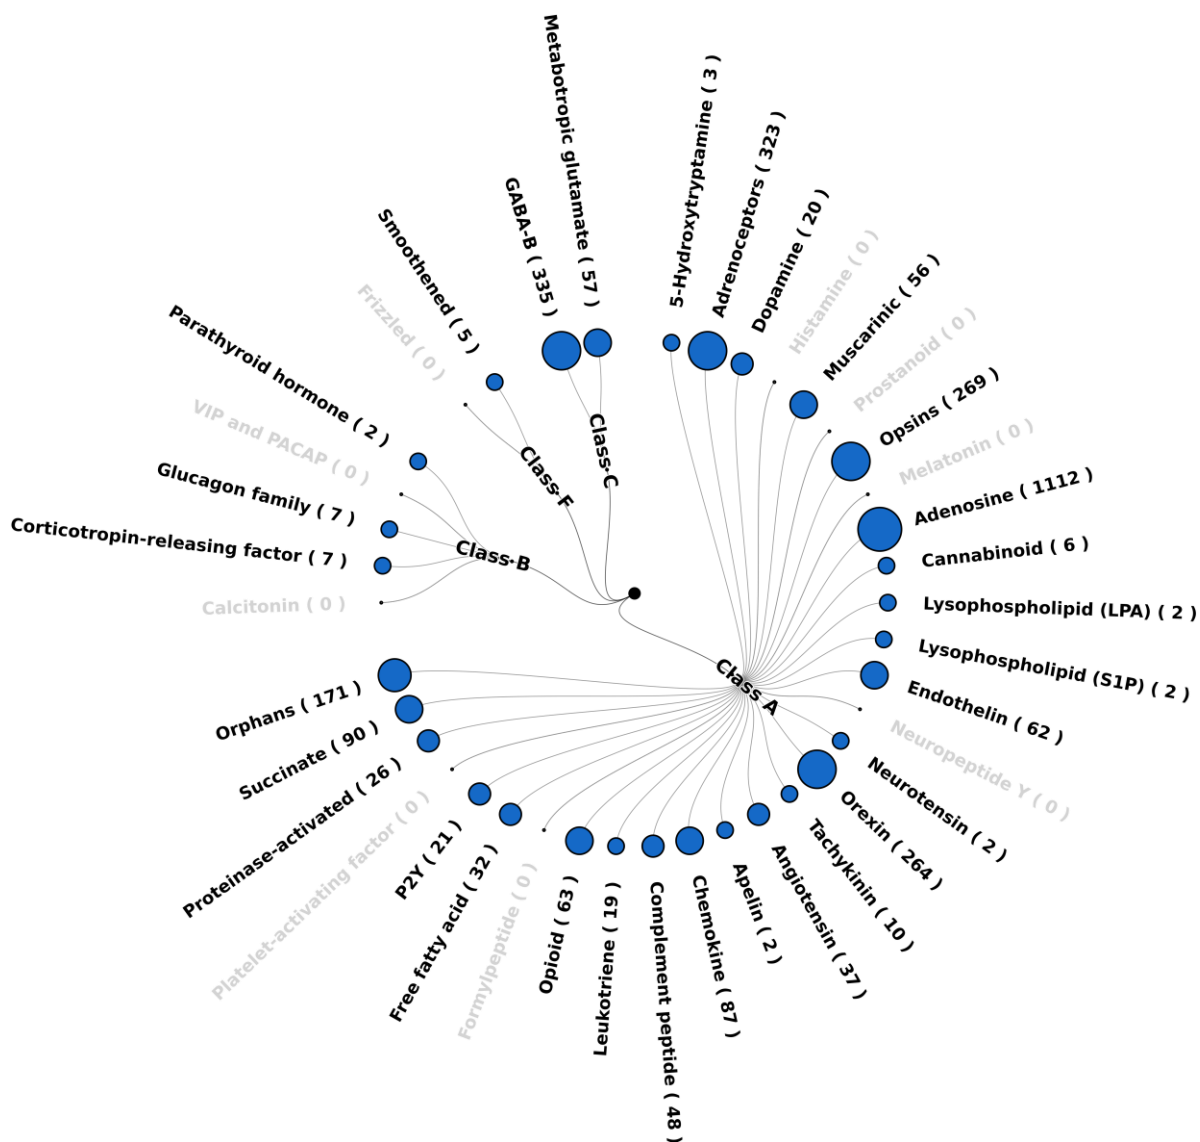

## REFERENCES

1. Bostock.M., Ogievetsky.V. and Heer.J. (2011) D3: Data-Driven Documents. IEEE Trans. Vis. Comput. Graph.. 17. 2301–2309.
